# Supplementary material for: Mitigation of Acetamiprid Residue Disruption on Pea Seed Germination by Selenium Nanoparticles and Lentinans
Source: MDPI journal article supplement (doi:10.3390/plants12152781), 2023-07-27
Supplement: s1 [file s1]

Table S1 Gradient elution program of mobile phase for analyzing acetamiprid

| Time (min) | Phase A (%) | Phase B (%) | Flow rate (mL/min) |
|------------|-------------|-------------|--------------------|
| 0.00       | 95.00       | 5.00        | 0.200              |
| 3.00       | 70.00       | 30.00       | 0.200              |
| 5.00       | 1.00        | 99.00       | 0.200              |
| 5.50       | 1.00        | 99.00       | 0.200              |
| 5.80       | 95.00       | 5.00        | 0.200              |
| 6.20       | 95.00       | 5.00        | 0.200              |

Note: phase A is 0.1% (v/v) formic acid aqueous solution; phase B is acetonitrile.

Table S2 Mass parameters for analyzing acetamiprid concentration

| Compound    | Retention time (min) | Parent ion (m/z) | Daughter ion (m/z)       | Cone voltage (V) | Collision energy (eV) | Polarity |
|-------------|----------------------|------------------|--------------------------|------------------|-----------------------|----------|
| Acetamiprid | 1.42                 | 233.0            | 126.0 <sup>*</sup> /56.0 | 80               | 15/15                 | +        |

Note: <sup>\*</sup> indicates quantitative ion.

Table S3 Linear relation of acetamiprid

| Matrix       | Linear equations  | Linear range (mg/L) | R <sup>2</sup> | Matrix effect (%) |
|--------------|-------------------|---------------------|----------------|-------------------|
| Acetonitrile | y=4859748x+44287  | 0.01-1.0            | 1              | —                 |
| Pea seeds    | y= 3449788x+88064 |                     | 0.9971         | -29.0             |

Note: Matrix effect (%) =  $(\frac{S_m}{S_s}-1) \times 100\%$ ; S<sub>m</sub> is the slope of the calibration curve in the matrix (pea seeds); S<sub>s</sub> is the slope of the calibration curve in the solvent (acetonitrile).

Table S4 Recoveries of acetamiprid in pea seeds (n = 5)

| Spiked level (mg/kg) | Average recovery (%) | RSD (%) |
|----------------------|----------------------|---------|
| 2                    | 96                   | 7.4     |
| 1                    | 93                   | 3.7     |
| 0.2                  | 82                   | 7.7     |
| 0.01                 | 79                   | 11.6    |

Table S5 Gradient elution program of mobile phase for analyzing plant hormones

| Time (min) | Phase A (%) | Phase B (%) | Flow rate (mL/min) |
|------------|-------------|-------------|--------------------|
| 0.00       | 95.00       | 5.00        | 0.200              |
| 3.00       | 0.00        | 100.00      | 0.200              |
| 4.00       | 0.00        | 100.00      | 0.200              |
| 4.01       | 95.00       | 5.00        | 0.200              |
| 5.30       | 95.00       | 5.00        | 0.200              |

Note: phase A is a 0.1% (v/v) formic acid aqueous solution; phase B is acetonitrile.

Table S6 Mass parameters for analyzing plant hormones

| Metabolite | Retention time (min) | Parent ion (m/z) | Daughter ion (m/z) | Cone voltage (V) | Collision energy (eV) | Polarity |
|------------|----------------------|------------------|--------------------|------------------|-----------------------|----------|
| IAA        | 1.70                 | 174.1            | 130.1              | 50               | 5                     | —        |
| SA         | 1.75                 | 137.1            | 93.1               | 55               | 15                    | —        |
| ABA        | 1.77                 | 263.3            | 153.1              | 60               | 5                     | —        |
| JA         | 2.00                 | 209.2            | 59.1               | 75               | 5                     | —        |

Table S7 Gradient elution program of mobile phase for analyzing 4-hydroxybenzoic acid, caffeic acid, sinapic acid and ferulic acid

| Time (min) | Phase A (%) | Phase B (%) | Flow rate (mL/min) |
|------------|-------------|-------------|--------------------|
| 0.00       | 95.00       | 5.00        | 0.200              |
| 5.00       | 0.00        | 100.00      | 0.200              |
| 6.00       | 0.00        | 100.00      | 0.200              |
| 6.01       | 95.00       | 5.00        | 0.200              |
| 7.30       | 95.00       | 5.00        | 0.200              |

Note: phase A is 0.1% (v/v) formic acid aqueous solution; phase B is acetonitrile.

Table S8 Mass parameters for analyzing 4-hydroxybenzoic acid, caffeic acid sinapic acid and ferulic acid

| Metabolite            | Retention time (min) | Parent ion (m/z) | Daughter ion (m/z) | Cone voltage (V) | Collision energy (eV) | Polarity |
|-----------------------|----------------------|------------------|--------------------|------------------|-----------------------|----------|
| 4-Hydroxybenzoic acid | 1.48                 | 137.0            | 93.1               | 70               | 15                    | –        |
| Caffeic acid          | 1.70                 | 179.0            | 135.0              | 65               | 15                    | –        |
| Sinapic acid          | 2.00                 | 223.1            | 208.0              | 90               | 10                    | –        |
| Ferulic acid          | 2.04                 | 193.0            | 134.0              | 90               | 18                    | –        |

Table S9 Gradient elution program of mobile phase for analyzing quercetin, luteolin and kaempferol

| Time (min) | Phase A (%) | Phase B (%) | Flow rate (mL/min) |
|------------|-------------|-------------|--------------------|
| 0.00       | 95.00       | 5.00        | 0.200              |
| 4.00       | 0.00        | 100.00      | 0.200              |
| 5.00       | 0.00        | 100.00      | 0.200              |
| 5.01       | 95.00       | 5.00        | 0.200              |
| 6.30       | 95.00       | 5.00        | 0.200              |

Note: phase A is 0.1% (v/v) formic acid aqueous solution; phase B is acetonitrile.

Table S10 Mass parameters for analyzing quercetin, luteolin and kaempferol

| Metabolite | Retention time (min) | Parent ion (m/z) | Daughter ion (m/z) | Cone voltage (V) | Collision energy (eV) | Polarity |
|------------|----------------------|------------------|--------------------|------------------|-----------------------|----------|
| Quercetin  | 1.72                 | 301.0            | 151.0              | 140              | 20                    | –        |
| Luteolin   | 2.12                 | 285.0            | 133.0              | 160              | 35                    | –        |
| Kaempferol | 2.42                 | 285.0            | 117.0              | 155              | 45                    | –        |

Table S11 Gradient elution program of mobile phase for analyzing phenylalanine, coniferyl alcohol and 4-coumaraldehyde

| Time (min) | Phase A (%) | Phase B (%) | Flow rate (mL/min) |
|------------|-------------|-------------|--------------------|
| 0.00       | 5.00        | 95.00       | 0.200              |
| 3.00       | 95.00       | 5.00        | 0.200              |
| 3.10       | 5.00        | 95.00       | 0.200              |
| 4.01       | 5.00        | 95.00       | 0.200              |

Note: phase A is 0.1% (v/v) formic acid aqueous solution; phase B is acetonitrile.

Table S12 Mass parameters for analyzing phenylalanine, coniferyl alcohol and 4-coumaraldehyde

| Metabolite        | Retention time (min) | Parent ion (m/z) | Daughter ion (m/z) | Cone voltage (V) | Collision energy (eV) | Polarity |
|-------------------|----------------------|------------------|--------------------|------------------|-----------------------|----------|
| Phenylalanine     | 0.79                 | 180.1            | 163.1/120.0*       | 90               | 10/10                 | +        |
| Coniferyl alcohol | 0.82                 | 179.1            | 119.0/91.1*        | 90               | 20/30                 | +        |
| 4-Coumaraldehyde  | 2.21                 | 149.1            | 131.0/103*         | 90               | 10/20                 | +        |

Note: \* indicates quantitative ions

Table S13 Gradient elution program of mobile phase for analyzing 4-coumaric acid, 4-coumaryl alcohol, sinapyl alcohol and caffeyl alcohol

| Time (min) | Phase A (%) | Phase B (%) | Flow rate (mL/min) |
|------------|-------------|-------------|--------------------|
| 0.00       | 5.00        | 95.00       | 0.200              |
| 3.00       | 95.00       | 5.00        | 0.200              |
| 3.01       | 5.00        | 95.00       | 0.200              |
| 4.00       | 5.00        | 95.00       | 0.200              |

Note: phase A is 0.1% (v/v) formic acid aqueous solution; phase B is acetonitrile.

Table S14 Mass parameters for analyzing 4-coumaric acid, 4-coumaryl alcohol, sinapyl alcohol and caffeyl alcohol

| Metabolite         | Retention time (min) | Parent ion (m/z) | Daughter ion (m/z) | Cone voltage (V) | Collision energy (eV) | Polarity |
|--------------------|----------------------|------------------|--------------------|------------------|-----------------------|----------|
| 4-Coumaric acid    | 0.75                 | 163.1            | 119.0              | 50               | 20                    | —        |
| 4-Coumaryl alcohol | 2.33                 | 151.0            | 128.1/110.0*       | 60               | 4/4                   | +        |
| Sinapyl alcohol    | 2.35                 | 153.1            | 119.9/67.7*        | 60               | 4/10                  | +        |
| Caffeyl alcohol    | 2.37                 | 167.2            | 126.0/84.9*        | 60               | 4/10                  | +        |

Note: \* indicates quantitative ions
